# Supplementary material for: The Impact of Rubella Vaccine Introduction on Rubella Infection and Congenital Rubella Syndrome: A Systematic Review of Mathematical Modelling Studies
Source: MDPI journal article supplement (doi:10.3390/vaccines9020084), 2021-01-25
Supplement: s1 [file s1]

## Supplementary material

**Supplement Table S1: Search strategy for Scopus and Pubmed**

**DATABASE: SCOPUS**

**DATE SEARCHED: 19 JUNE 2020**

|   | Query                                                                                                                                                                                                                                                                                                                                                                            | Results                     |
|---|----------------------------------------------------------------------------------------------------------------------------------------------------------------------------------------------------------------------------------------------------------------------------------------------------------------------------------------------------------------------------------|-----------------------------|
| 5 | ( TITLE-ABS-KEY ( rubella OR rubellas OR "german measles" OR "three day measles" ) ) AND ( TITLE-ABS-KEY ( vaccination OR vaccin* OR immuniz* OR immunis* ) ) AND ( TITLE-ABS-KEY ( model OR models OR modelling OR modeling OR modelled OR modeled OR "theoretical stud*" ) ) AND ( LIMIT-TO ( DOCTYPE , "ar" ) OR LIMIT-TO ( DOCTYPE , "re" ) OR LIMIT-TO ( DOCTYPE , "cp" ) ) | 946 document results        |
| 4 | ( TITLE-ABS-KEY ( rubella OR rubellas OR "german measles" OR "three day measles" ) ) AND ( TITLE-ABS-KEY ( vaccination OR vaccin* OR immuniz* OR immunis* ) ) AND ( TITLE-ABS-KEY ( model OR models OR modelling OR modeling OR modelled OR modeled OR "theoretical stud*" ) )                                                                                                   | 987 document results        |
| 3 | TITLE-ABS-KEY ( model OR models OR modelling OR modeling OR modelled OR modeled OR "theoretical stud*" )                                                                                                                                                                                                                                                                         | 13,477,036 document results |
| 2 | TITLE-ABS-KEY ( vaccination OR vaccin* OR immuniz* OR immunis* )                                                                                                                                                                                                                                                                                                                 | 620,481 document results    |
| 1 | TITLE-ABS-KEY ( rubella OR rubellas OR "german measles" OR "three day measles" )                                                                                                                                                                                                                                                                                                 | 24,817 document results     |

**DATABASE: PUBMED**

**DATE SEARCHED: 19 JUNE 2020**

|    | Query                                                                                    | Results                    |
|----|------------------------------------------------------------------------------------------|----------------------------|
| #4 | Search: #1 AND #2 AND #3                                                                 | 447 document results       |
| #3 | Search: Models, Theoretical [mh] OR model*[tiab] OR theoretical stud*[tiab]              | 3,807,970 document results |
| #2 | Search: Vaccination[mh] OR vaccin*[tiab] OR immuniz*[tiab] OR immunis*[tiab]             | 402,546 document results   |
| #1 | Search: Rubella[mh] OR rubella*[tiab] OR german measles[tiab] OR three day measles[tiab] | 14,410 document results    |

**Supplement Table S2: Risk of bias tool for assessment of included studies**

|   | Criterion (adapted from Fone <i>et al.</i> & Caro <i>et al.</i> )  | Considerations (adapted from Fone et al. and Caro et al.)                                                                                   | Score considerations (0, poor to 2, good)                                                                                                                                                                                  |                             |
|---|--------------------------------------------------------------------|---------------------------------------------------------------------------------------------------------------------------------------------|----------------------------------------------------------------------------------------------------------------------------------------------------------------------------------------------------------------------------|-----------------------------|
| 1 | Are the aims and objectives clear?                                 | Are the research questions and modelling objectives clearly defined?                                                                        | 0 Not stated<br>1 Stated but vague<br>2 Stated and focussed                                                                                                                                                                | Definition s: max 8 points  |
| 2 | Is the setting and population clearly defined?                     | Does the paper clearly state the setting (e.g. geographical location, high/low TB burden)?                                                  | 0 Not stated<br>1 Stated but vague or details missing<br>2 Stated and focussed                                                                                                                                             |                             |
|   |                                                                    | In health economics models, has the perspective been stated?                                                                                |                                                                                                                                                                                                                            |                             |
|   |                                                                    | Does the paper clearly state the modelled population? (e.g. patient or population group characteristics)                                    |                                                                                                                                                                                                                            |                             |
|   |                                                                    | Have sub-populations necessary for the research question and setting been modelled?                                                         |                                                                                                                                                                                                                            |                             |
| 3 | Are the intervention and comparators adequately defined?           | Does the paper clearly state the population(s) targeted for vaccination?                                                                    | 0 Not stated or very unclear<br>1 Stated but details missing<br>2 Stated and all necessary details stated                                                                                                                  |                             |
|   |                                                                    | Does the paper clearly define the vaccine characteristics (e.g. vaccine efficacy, duration of protection, number of doses, waning, timing)? |                                                                                                                                                                                                                            |                             |
|   |                                                                    | If there is a comparator (no vaccine, baseline or alternative intervention scenario), is it clearly defined?                                |                                                                                                                                                                                                                            |                             |
| 4 | Are the outcome measures defined and answer the research question? | Does the paper clearly define the outcomes of interest?                                                                                     | 0 Not stated, very unclear or not suited to research question<br>1 Stated but details missing or not directly aligned with research question<br>2 Stated, all necessary details stated, and aligned with research question |                             |
|   |                                                                    | Do the outcomes correspond to the research question?                                                                                        |                                                                                                                                                                                                                            |                             |
| 5 | Are the model structure and time horizon clearly described and     | Is the model structure clearly reported and appropriate for the research question?                                                          | 0 Not appropriate model structure, or poor/no description of model<br>1 Incomplete description, and/or appropriate in part for research question                                                                           | Model methods: max 4 points |
|   |                                                                    | Does the model reflect current knowledge of disease natural history?                                                                        |                                                                                                                                                                                                                            |                             |

|    |                                                                                                                       |                                                                                                                                                                                                                                                                                                              |                                                                                                                                                                                                       |                                          |
|----|-----------------------------------------------------------------------------------------------------------------------|--------------------------------------------------------------------------------------------------------------------------------------------------------------------------------------------------------------------------------------------------------------------------------------------------------------|-------------------------------------------------------------------------------------------------------------------------------------------------------------------------------------------------------|------------------------------------------|
|    | <b>appropriate for the research question?</b>                                                                         | Is the time horizon and time step of the model clearly stated and appropriate to the research question (i.e. is it long enough to capture health effects)?                                                                                                                                                   | 2 Complete and reproducible, appropriate structure and time horizon                                                                                                                                   |                                          |
| 6  | <b>Are the modelling methods appropriate for the research question and adequately described?</b>                      | Were the modelling methods clearly described, and suited to the research question?                                                                                                                                                                                                                           | 0 Not appropriate model structure, or poor/no description of methods<br>1 Incomplete description, and/or appropriate in part for research question<br>2 Complete and reproducible, appropriate method |                                          |
| 7  | <b>Are the parameters, ranges and data sources specified?</b>                                                         | Are all parameters and their ranges reported?<br>Are the data sources for parameters reported?                                                                                                                                                                                                               | 0 Poorly reported<br>1 Some information missing<br>2 Complete reporting of parameters, ranges and data sources                                                                                        | Model inputs:<br>max 6 points            |
| 8  | <b>Are any assumptions explicit and justified?</b>                                                                    | Are all assumptions explicit and justified?                                                                                                                                                                                                                                                                  | 0 Not reported<br>1 Explicit<br>2 Explicit and justified                                                                                                                                              |                                          |
| 9  | <b>Is the quality of data considered and is uncertainty explored through uncertainty and/or sensitivity analyses?</b> | Are data limitations discussed? Are any of the sources known to the reviewer to be inappropriate (e.g. do not match the parameter, are outdated, or known to be poor quality)?<br>Is uncertainty in model structure, parameters and/or assumptions explored through uncertainty and/or sensitivity analyses? | 0 No sources or uncertainty<br>1 Partially addressed, and/or some data inappropriate<br>2 Fully addressed                                                                                             |                                          |
| 10 | <b>Is the method of fitting described and suitable?</b>                                                               | Is the method of fitting/calibrating the model clearly described?<br>Is the method of model fitting/calibration suitable?                                                                                                                                                                                    | 0 Not done, unsuitable method or poor/no description<br>1 Incomplete description or method not optimal<br>2 Complete description and suitable methods                                                 | Fitting/<br>validation<br>: max 4 points |
| 11 | <b>Has the model been validated?</b>                                                                                  | Has an assessment of validity of the results been made by comparing across one or more different model structures, or against a validation data set?                                                                                                                                                         | 0 Not considered<br>1 States criteria for validation<br>2 Validation undertaken                                                                                                                       |                                          |
| 12 | <b>Have the results been clearly and completely presented, with a range of uncertainty?</b>                           | Have the outcome values and their uncertainty ranges for each intervention/scenario been reported?<br>Do the results match the objectives?<br>Are sensitivity analyses clearly reported?                                                                                                                     | 0 Not reported, very unclear or not suited to research question<br>1 Stated, but ranges or planned sensitivity analyses missing and/or not directly aligned with research question                    | Results:<br>max 4 points                 |

|        |                                                                            |                                                                                       |                                                                                                                                                                                           |                            |
|--------|----------------------------------------------------------------------------|---------------------------------------------------------------------------------------|-------------------------------------------------------------------------------------------------------------------------------------------------------------------------------------------|----------------------------|
|        |                                                                            |                                                                                       | 2 Values and ranges and planned sensitivity analyses reported and aligned with research question.                                                                                         |                            |
| 1<br>3 | <b>Are the results appropriately interpreted and discussed in context?</b> | Does the discussion reflect a fair and balanced interpretation of the results?        | 0 No/poor discussion<br>1 Some discussion but key points, limitations or context missed<br>2 Full discussion of key points in context, generalisability considered, limitations discussed |                            |
|        |                                                                            | Are the results of the study discussed in context and is generalisability considered? |                                                                                                                                                                                           |                            |
|        |                                                                            | Are possible biases and limitations discussed?                                        |                                                                                                                                                                                           |                            |
| 1<br>4 | <b>Are the funding source and conflicts of interest reported?</b>          | Is the funding and the role of the funder clearly stated?                             | 0 No statement of funding or conflicts<br>1 Funding or conflicts reported<br>2 Funding and conflict statement                                                                             | Conflicts:<br>Max 2 points |

| Overall Scoring: Max 28 points |       |
|--------------------------------|-------|
| Very high                      | >22   |
| High                           | 19-22 |
| Medium                         | 14-18 |
| Low                            | <14   |

**Supplement Table S3: PRISMA checklist**

| Section/topic                      | #  | Checklist item                                                                                                                                                                                                                                                                                              | Reported on page # |
|------------------------------------|----|-------------------------------------------------------------------------------------------------------------------------------------------------------------------------------------------------------------------------------------------------------------------------------------------------------------|--------------------|
| <b>TITLE</b>                       |    |                                                                                                                                                                                                                                                                                                             |                    |
| Title                              | 1  | Identify the report as a systematic review, meta-analysis, or both.                                                                                                                                                                                                                                         | 1                  |
| <b>ABSTRACT</b>                    |    |                                                                                                                                                                                                                                                                                                             |                    |
| Structured summary                 | 2  | Provide a structured summary including, as applicable: background; objectives; data sources; study eligibility criteria, participants, and interventions; study appraisal and synthesis methods; results; limitations; conclusions and implications of key findings; systematic review registration number. | 2                  |
| <b>INTRODUCTION</b>                |    |                                                                                                                                                                                                                                                                                                             |                    |
| Rationale                          | 3  | Describe the rationale for the review in the context of what is already known.                                                                                                                                                                                                                              | 4                  |
| Objectives                         | 4  | Provide an explicit statement of questions being addressed with reference to participants, interventions, comparisons, outcomes, and study design (PICOS).                                                                                                                                                  | 4                  |
| <b>METHODS</b>                     |    |                                                                                                                                                                                                                                                                                                             |                    |
| Protocol and registration          | 5  | Indicate if a review protocol exists, if and where it can be accessed (e.g., Web address), and, if available, provide registration information including registration number.                                                                                                                               | 6                  |
| Eligibility criteria               | 6  | Specify study characteristics (e.g., PICOS, length of follow-up) and report characteristics (e.g., years considered, language, publication status) used as criteria for eligibility, giving rationale.                                                                                                      | 5                  |
| Information sources                | 7  | Describe all information sources (e.g., databases with dates of coverage, contact with study authors to identify additional studies) in the search and date last searched.                                                                                                                                  | 5                  |
| Search                             | 8  | Present full electronic search strategy for at least one database, including any limits used, such that it could be repeated.                                                                                                                                                                               | S1                 |
| Study selection                    | 9  | State the process for selecting studies (i.e., screening, eligibility, included in systematic review, and, if applicable, included in the meta-analysis).                                                                                                                                                   | 6                  |
| Data collection process            | 10 | Describe method of data extraction from reports (e.g., piloted forms, independently, in duplicate) and any processes for obtaining and confirming data from investigators.                                                                                                                                  | 5                  |
| Data items                         | 11 | List and define all variables for which data were sought (e.g., PICOS, funding sources) and any assumptions and simplifications made.                                                                                                                                                                       | 5                  |
| Risk of bias in individual studies | 12 | Describe methods used for assessing risk of bias of individual studies (including specification of whether this was done at the study or outcome level), and how this information is to be used in any data synthesis.                                                                                      | S2                 |
| Summary measures                   | 13 | State the principal summary measures (e.g., risk ratio, difference in means).                                                                                                                                                                                                                               | 5                  |

|                      |    |                                                                                                                                                           |   |
|----------------------|----|-----------------------------------------------------------------------------------------------------------------------------------------------------------|---|
| Synthesis of results | 14 | Describe the methods of handling data and combining results of studies, if done, including measures of consistency (e.g., $I^2$ ) for each meta-analysis. | 6 |
|----------------------|----|-----------------------------------------------------------------------------------------------------------------------------------------------------------|---|

| Section/topic                 | #  | Checklist item                                                                                                                                                                                           | Reported on page # |
|-------------------------------|----|----------------------------------------------------------------------------------------------------------------------------------------------------------------------------------------------------------|--------------------|
| Risk of bias across studies   | 15 | Specify any assessment of risk of bias that may affect the cumulative evidence (e.g., publication bias, selective reporting within studies).                                                             | 5                  |
| Additional analyses           | 16 | Describe methods of additional analyses (e.g., sensitivity or subgroup analyses, meta-regression), if done, indicating which were pre-specified.                                                         | 6                  |
| <b>RESULTS</b>                |    |                                                                                                                                                                                                          |                    |
| Study selection               | 17 | Give numbers of studies screened, assessed for eligibility, and included in the review, with reasons for exclusions at each stage, ideally with a flow diagram.                                          | 6                  |
| Study characteristics         | 18 | For each study, present characteristics for which data were extracted (e.g., study size, PICOS, follow-up period) and provide the citations.                                                             | 6 & 7              |
| Risk of bias within studies   | 19 | Present data on risk of bias of each study and, if available, any outcome level assessment (see item 12).                                                                                                | 18                 |
| Results of individual studies | 20 | For all outcomes considered (benefits or harms), present, for each study: (a) simple summary data for each intervention group (b) effect estimates and confidence intervals, ideally with a forest plot. | 16 & 17            |
| Synthesis of results          | 21 | Present the main results of the review. If meta-analyses are done, include for each, confidence intervals and measures of consistency.                                                                   | 7 & 8              |
| Risk of bias across studies   | 22 | Present results of any assessment of risk of bias across studies (see Item 15).                                                                                                                          | 18                 |
| Additional analysis           | 23 | Give results of additional analyses, if done (e.g., sensitivity or subgroup analyses, meta-regression [see Item 16]).                                                                                    | N/A                |
| <b>DISCUSSION</b>             |    |                                                                                                                                                                                                          |                    |
| Summary of evidence           | 24 | Summarize the main findings including the strength of evidence for each main outcome; consider their relevance to key groups (e.g., healthcare providers, users, and policy makers).                     | 9                  |
| Limitations                   | 25 | Discuss limitations at study and outcome level (e.g., risk of bias), and at review-level (e.g., incomplete retrieval of identified research, reporting bias).                                            | 10                 |
| Conclusions                   | 26 | Provide a general interpretation of the results in the context of other evidence, and implications for future research.                                                                                  | 10                 |
| <b>FUNDING</b>                |    |                                                                                                                                                                                                          |                    |

|         |    |                                                                                                                                            |    |
|---------|----|--------------------------------------------------------------------------------------------------------------------------------------------|----|
| Funding | 27 | Describe sources of funding for the systematic review and other support (e.g., supply of data); role of funders for the systematic review. | 10 |
|---------|----|--------------------------------------------------------------------------------------------------------------------------------------------|----|

**Supplement Table S4: Characteristics of excluded studies**

| Unique ID of study (First author surname, year of publication & first word of title) | Is this a mathematical modelling study? | Does the study use a dynamic transmission model? | Does the study simulate rubella vaccine introduction? | Did the study compare vaccine introduction | Did study report time (in years) to the elimination of CRS? | Did study report time (in years) to rubella elimination? | Did study describe trends in rubella or CRS incidence? | Did study report number vaccinated per CRS case averted? | Did study report cost of vaccine introduction | What is the time horizon for the simulations in years? | Reason for exclusion             |
|--------------------------------------------------------------------------------------|-----------------------------------------|--------------------------------------------------|-------------------------------------------------------|--------------------------------------------|-------------------------------------------------------------|----------------------------------------------------------|--------------------------------------------------------|----------------------------------------------------------|-----------------------------------------------|--------------------------------------------------------|----------------------------------|
| Hincapie-Palacio_2010_Simulating                                                     | Yes                                     | Yes                                              | Yes                                                   | Yes                                        | No                                                          | No                                                       | No                                                     | No                                                       | No                                            | 2                                                      | Ineligible outcomes              |
| Reinert_2003_Evaluation                                                              | Yes                                     | No                                               | Yes                                                   | Yes                                        | No                                                          | No                                                       | No                                                     | No                                                       | No                                            | 30                                                     | Ineligible design                |
| Beraud_2018_Resurgence                                                               | Yes                                     | No                                               | No                                                    | No                                         | No                                                          | No                                                       | No                                                     | No                                                       | No                                            | 2                                                      | Ineligible design                |
| Buonomo_2011_A Simple                                                                | Yes                                     | Yes                                              | Yes                                                   | Yes                                        | No                                                          | No                                                       | Yes                                                    | No                                                       | No                                            | 3                                                      | Ineligible intervention duration |
| Edmunds_2000_Modelling                                                               | Yes                                     | Yes                                              | No                                                    | Yes                                        | No                                                          | No                                                       | Yes                                                    | No                                                       | No                                            | 40                                                     | Ineligible intervention          |
| Edmunds_2000_The pre-vaccination                                                     | Yes                                     | Yes                                              | No                                                    | No                                         | No                                                          | No                                                       | No                                                     | No                                                       | No                                            | N/A                                                    | Ineligible intervention          |
| Feng_2020_Influence                                                                  | Yes                                     | Yes                                              | No                                                    | No                                         | No                                                          | No                                                       | No                                                     | No                                                       | No                                            | N/A                                                    | Ineligible intervention          |
| Gao_2013_Models                                                                      | Yes                                     | Yes                                              | No                                                    | No                                         | Yes                                                         | Yes                                                      | Yes                                                    | No                                                       | No                                            | 60                                                     | Ineligible intervention          |
| Hachiya_2018_Evaluation                                                              | Yes                                     | No                                               | No                                                    | No                                         | No                                                          | No                                                       | No                                                     | No                                                       | No                                            | N/A                                                    | Ineligible design                |
| Lessler_2013_Balancing                                                               | Yes                                     | No                                               | Yes                                                   | Yes                                        | No                                                          | No                                                       | No                                                     | No                                                       | No                                            | N/A                                                    | Ineligible design                |
| Metcalf_2011_Rubella                                                                 | Yes                                     | Yes                                              | No                                                    | N/A                                        | No                                                          | No                                                       | No                                                     | No                                                       | No                                            | N/A                                                    | Ineligible intervention          |
| Metcalf_2012_Impact                                                                  | Yes                                     | Yes                                              | Yes                                                   | Yes                                        | Yes                                                         | No                                                       | Yes                                                    | No                                                       | No                                            | 30                                                     | Ineligible setting               |
| Metcalf_2012_Structured                                                              | Yes                                     | Yes                                              | No                                                    | No                                         | No                                                          | No                                                       | Yes                                                    | No                                                       | No                                            | 35                                                     | Ineligible intervention          |
| Thompson_2016_Synthesis                                                              | No                                      | No                                               | No                                                    | No                                         | No                                                          | No                                                       | No                                                     | No                                                       | No                                            | N/A                                                    | Ineligible design                |
| Thompson_2016_The Cost                                                               | No                                      | No                                               | No                                                    | No                                         | No                                                          | No                                                       | No                                                     | No                                                       | No                                            | N/A                                                    | Ineligible design                |
| Thompson_2017_Modelling                                                              | Yes                                     | Yes                                              | Yes                                                   | No                                         | No                                                          | No                                                       | No                                                     | No                                                       | No                                            | N/A                                                    | Ineligible intervention          |

|                          |     |     |     |    |     |    |     |    |     |    |                         |
|--------------------------|-----|-----|-----|----|-----|----|-----|----|-----|----|-------------------------|
| Vynnycky_2019_The_impact | Yes | Yes | Yes | No | Yes | No | Yes | No | Yes | 30 | Ineligible intervention |
|--------------------------|-----|-----|-----|----|-----|----|-----|----|-----|----|-------------------------|

**Supplement Table S5: Risk of bias assessment of included studies**

| Study             | Risk of bias item |                      |                            |                  |                                |                   |                                   |             |                                              |                   |                  |         |                                        |                                         | Final score | Quality Grading |
|-------------------|-------------------|----------------------|----------------------------|------------------|--------------------------------|-------------------|-----------------------------------|-------------|----------------------------------------------|-------------------|------------------|---------|----------------------------------------|-----------------------------------------|-------------|-----------------|
|                   | Aim & objectives  | Setting & population | intervention & comparators | Outcome measures | Model structure & time horizon | Modelling methods | Parameters, ranges & data sources | Assumptions | Quality of data & exploration of uncertainty | Method of fitting | Model validation | Results | Interpretation & discussion of results | Funding sources & conflicts of interest |             |                 |
| Gao (2006)        | 2                 | 2                    | 2                          | 2                | 2                              | 2                 | 1                                 | 2           | 1                                            | 0                 | 0                | 1       | 2                                      | 0                                       | 19          | High            |
| Jazbec (2004)     | 2                 | 2                    | 2                          | 2                | 2                              | 2                 | 1                                 | 2           | 1                                            | 0                 | 2                | 1       | 1                                      | 0                                       | 20          | High            |
| Motaze (2020)     | 2                 | 2                    | 2                          | 2                | 2                              | 2                 | 0                                 | 2           | 2                                            | 0                 | 0                | 2       | 2                                      | 2                                       | 22          | High            |
| Vynnycky (2016)   | 2                 | 2                    | 2                          | 2                | 2                              | 2                 | 0                                 | 2           | 2                                            | 0                 | 0                | 2       | 2                                      | 2                                       | 22          | High            |
| Wesolowski (2016) | 2                 | 2                    | 2                          | 2                | 2                              | 2                 | 0                                 | 2           | 1                                            | 0                 | 0                | 2       | 1                                      | 2                                       | 20          | High            |
| Winter (2017)     | 2                 | 2                    | 2                          | 2                | 2                              | 2                 | 0                                 | 2           | 2                                            | 0                 | 0                | 2       | 2                                      | 2                                       | 22          | High            |



|                  |   |   |   |   |   |   |   |   |   |   |   |   |   |   |    |                  |
|------------------|---|---|---|---|---|---|---|---|---|---|---|---|---|---|----|------------------|
| <b>Wu (2016)</b> | 2 | 2 | 2 | 2 | 2 | 2 | 2 | 2 | 2 | 0 | 0 | 2 | 2 | 2 | 24 | <b>Very high</b> |
|------------------|---|---|---|---|---|---|---|---|---|---|---|---|---|---|----|------------------|
